# Supplementary material for: Uncertainty sources in a large ensemble of hydrological projections: Regional Climate Models and Internal Variability matter
Source: Copernicus journal article supplement (doi:10.5194/hess-30-1023-2026), 2026-02-20
Supplement: Supplementary file 1 [file hess-30-1023-2026-supplement.pdf]

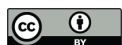

*Supplement of*

## **Uncertainty sources in a large ensemble of hydrological projections: Regional Climate Models and Internal Variability matter**

**Guillaume Evin et al.**

*Correspondence to:* Guillaume Evin ([guillaume.evin@inrae.fr](mailto:guillaume.evin@inrae.fr))

The copyright of individual parts of the supplement might differ from the article licence.

S1 quantiles of the CCR for climate indicators, for the RCP2.6 and RCP4.5 scenarios

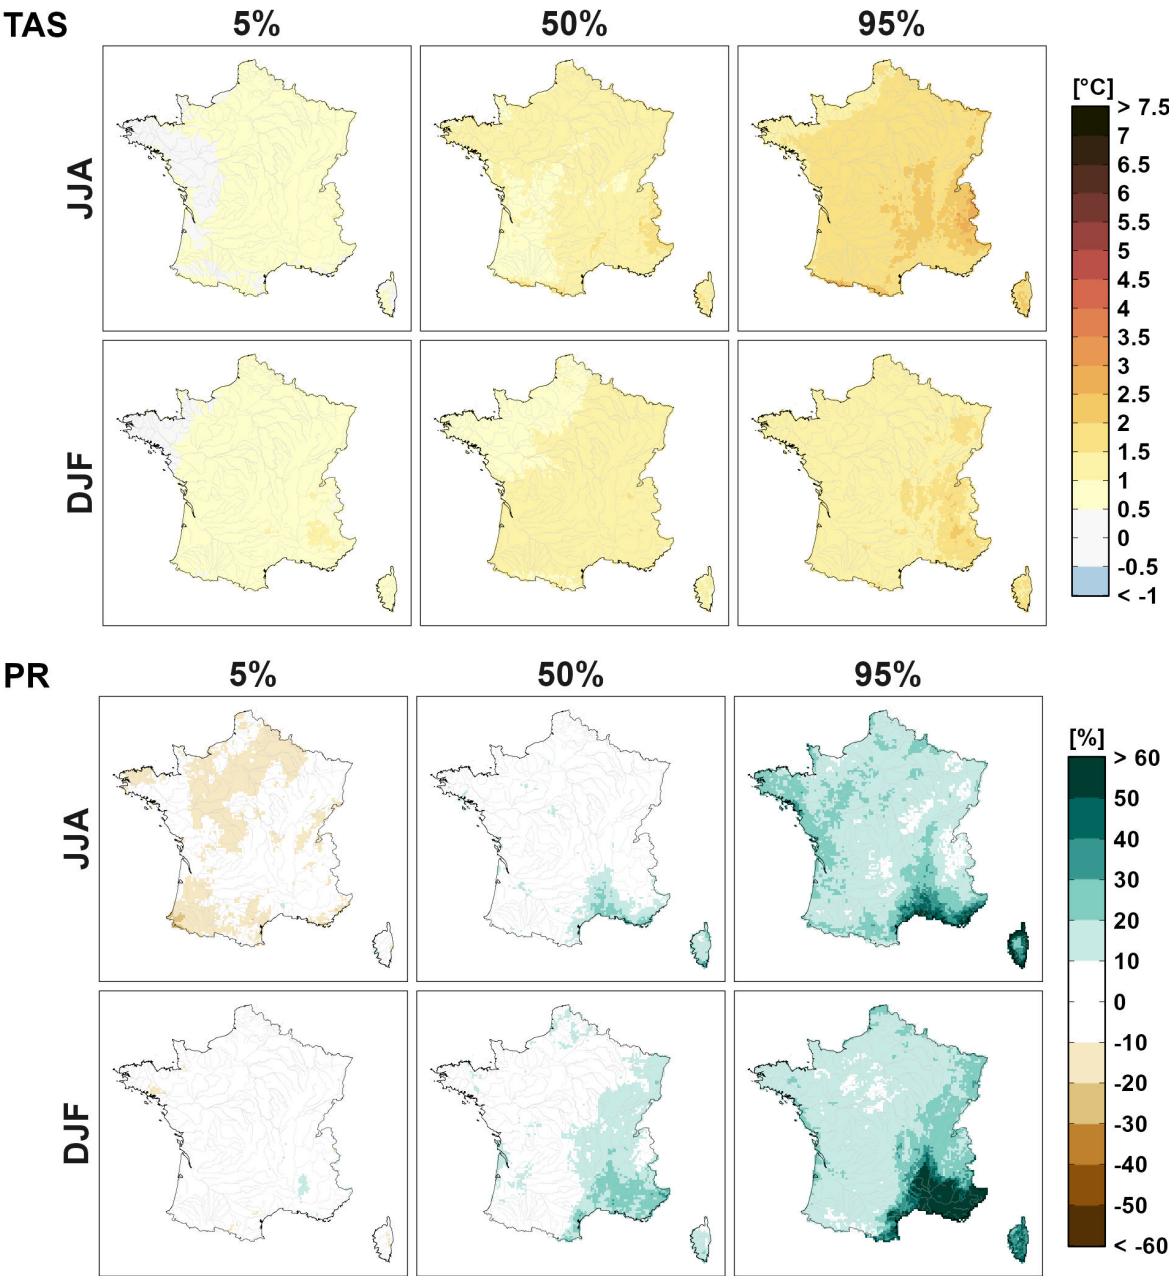

**Figure S1.** 5%, 50%, and 95% quantiles of the CCR for seasonal temperature (TAS), precipitation (PR), reference evapotranspiration (ET0) and annual precipitation maxima (RX1D) changes (2071-2099 relative to 1976-2005) in summer (JJA) and winter (DJF) for the RCP2.6.

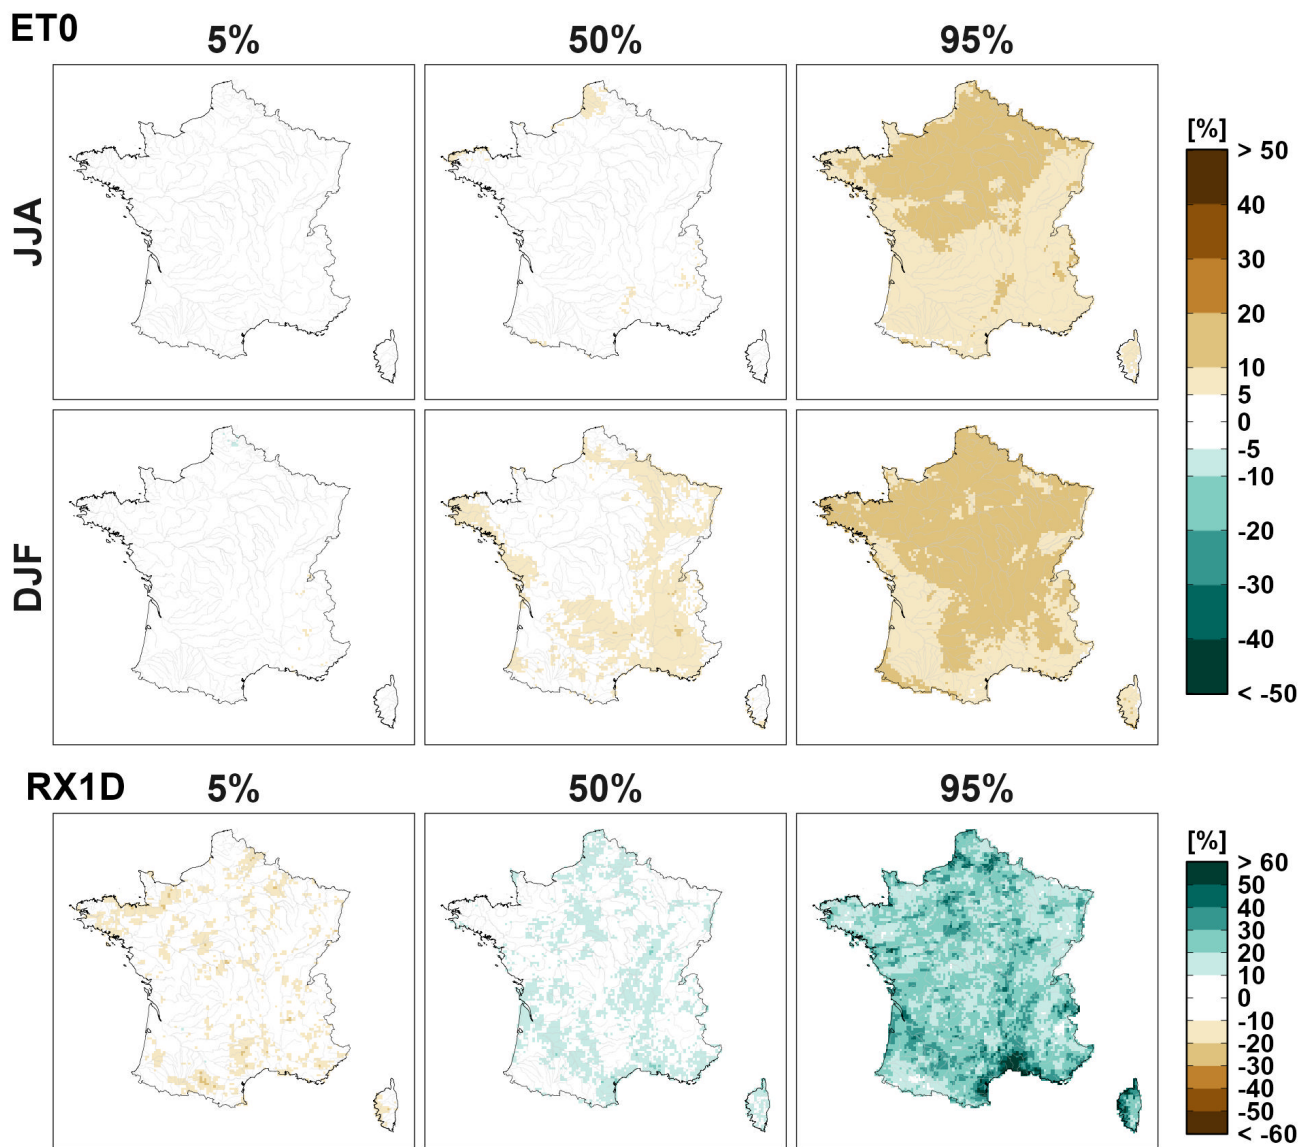

Figure S1. (continued).

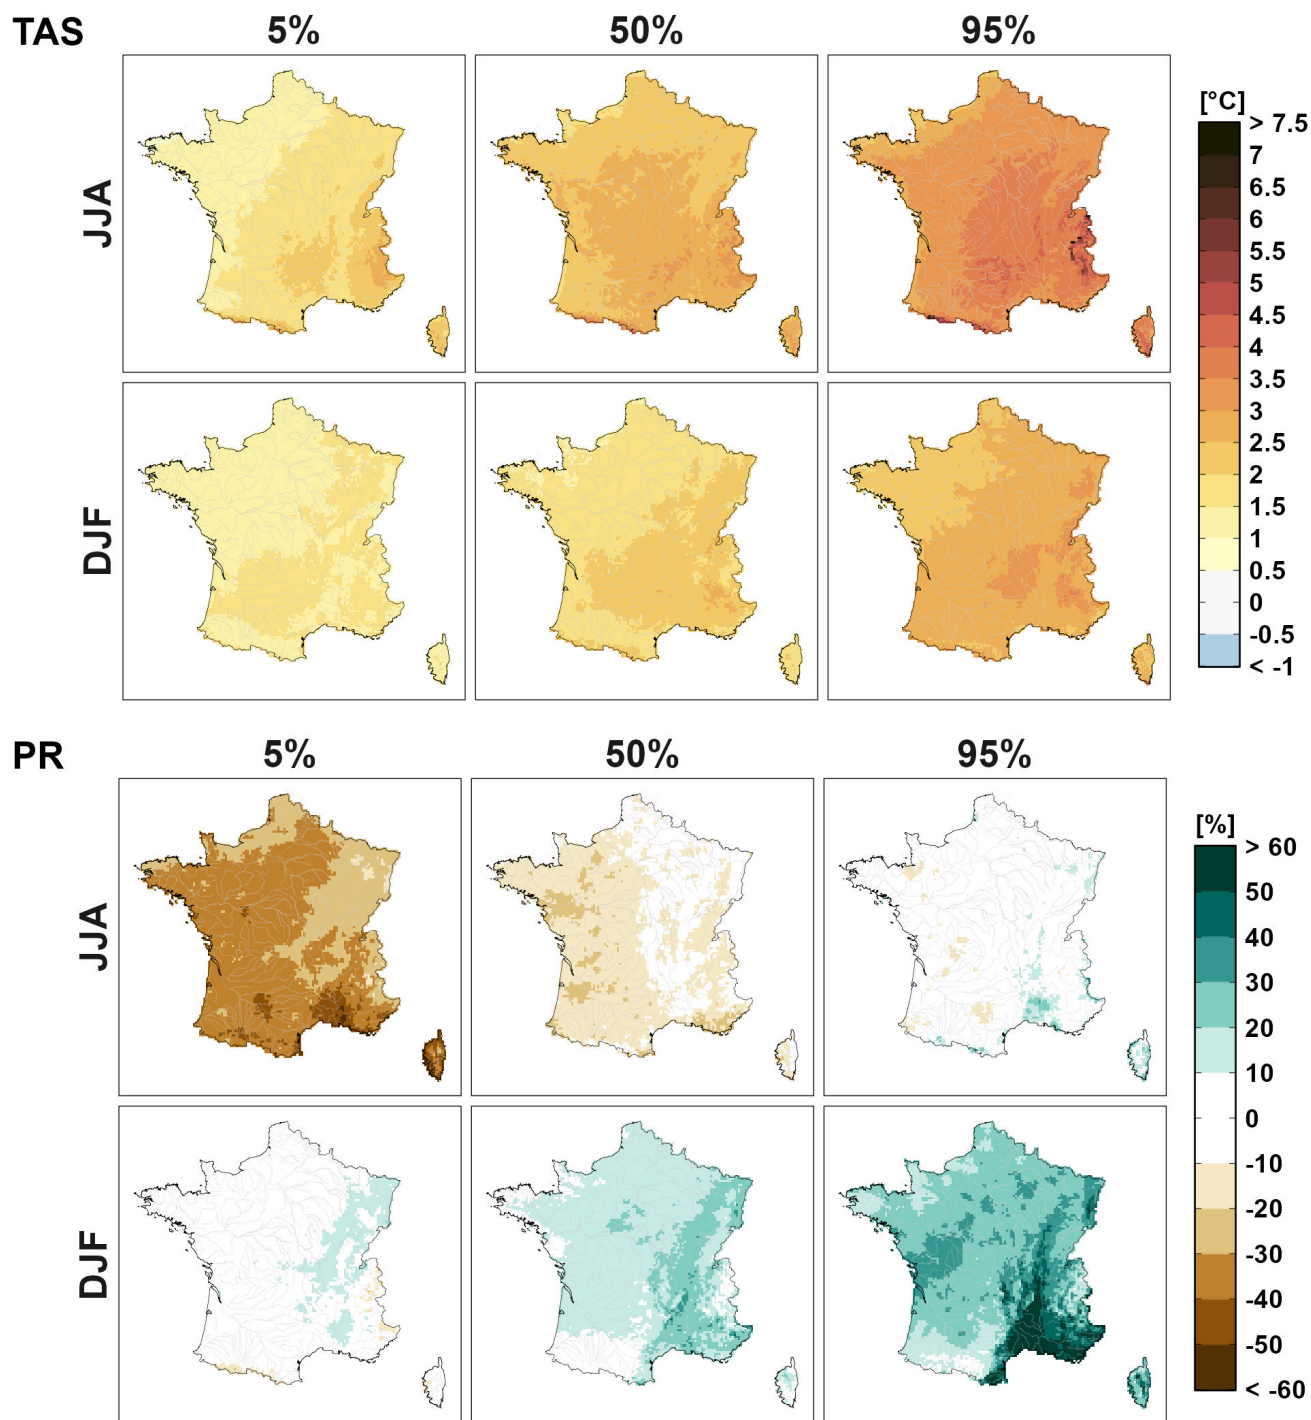

**Figure S2.** 5%, 50%, and 95% quantiles of the CCR for seasonal temperature (TAS), precipitation (PR), reference evapotranspiration (ET0) and annual daily precipitation maxima (RX1D) changes (2071-2099 relative to 1976-2005) in summer (JJA) and winter (DJF) for the RCP4.5.



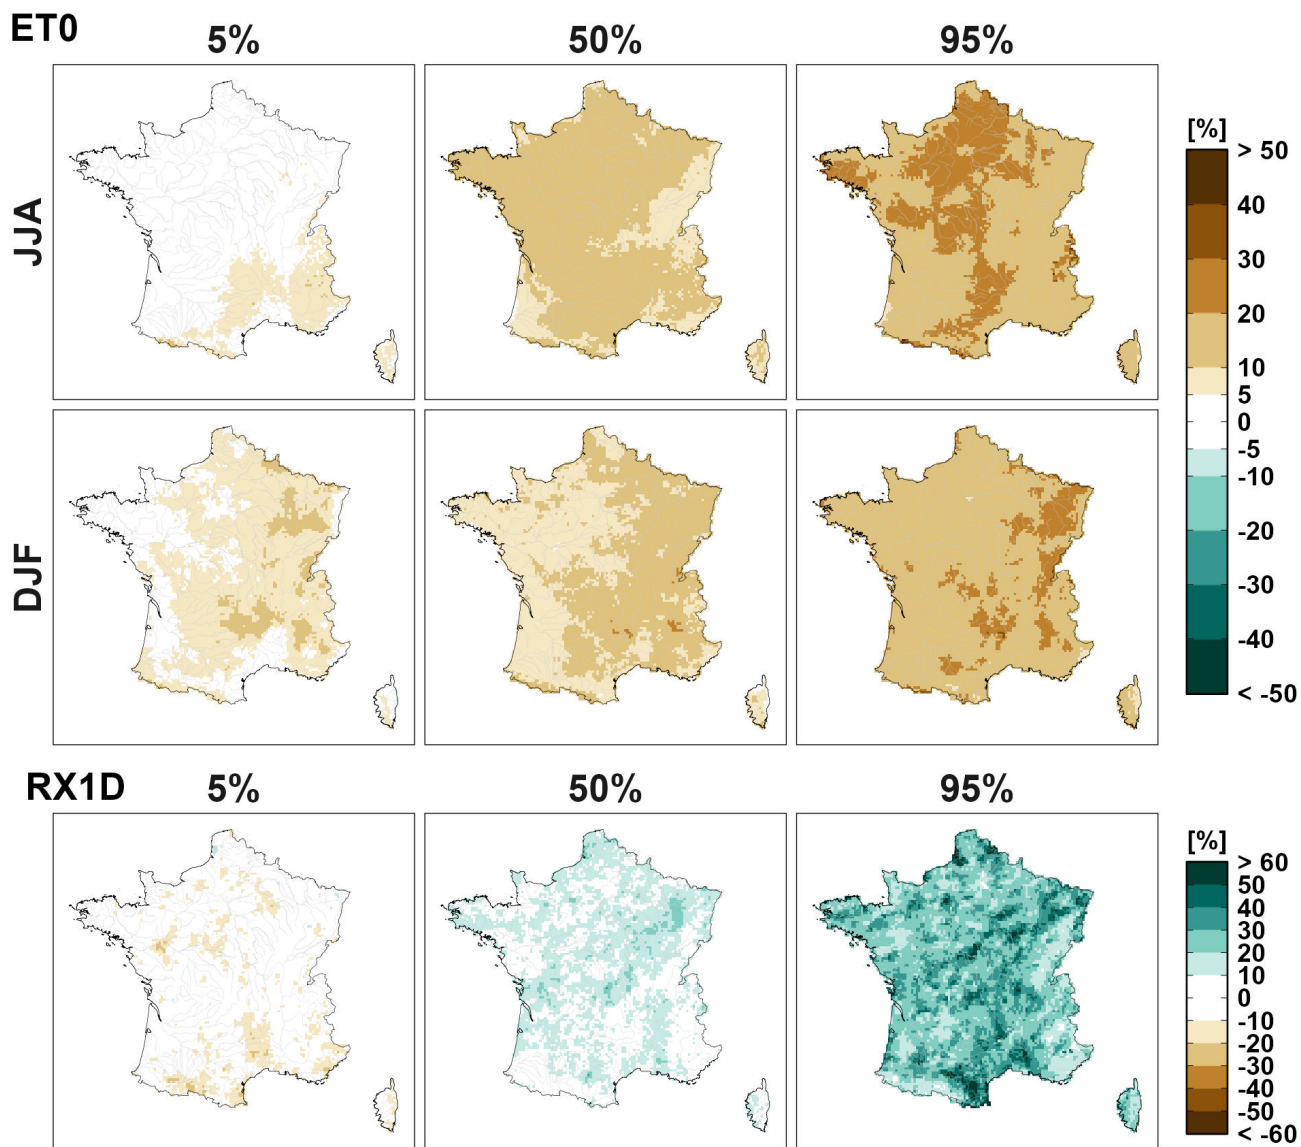

Figure S2. (continued).

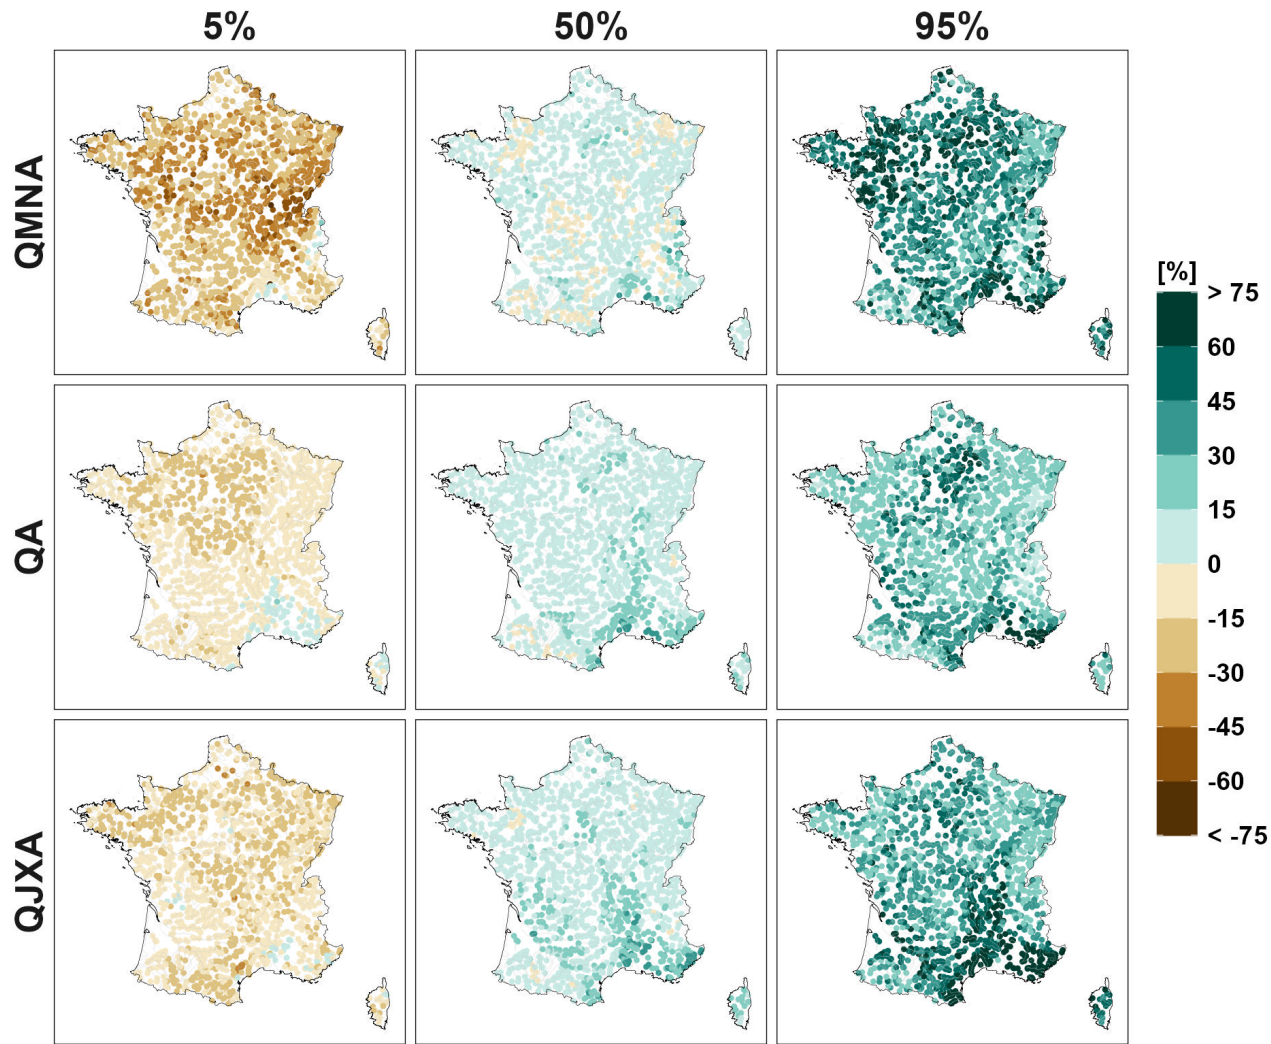

**Figure S3.** 5%, 50%, and 95% quantiles of the climate change responses for QMNA, QA, and QJXA changes (2071-2099 relative to 1976-2005) for the RCP2.6.

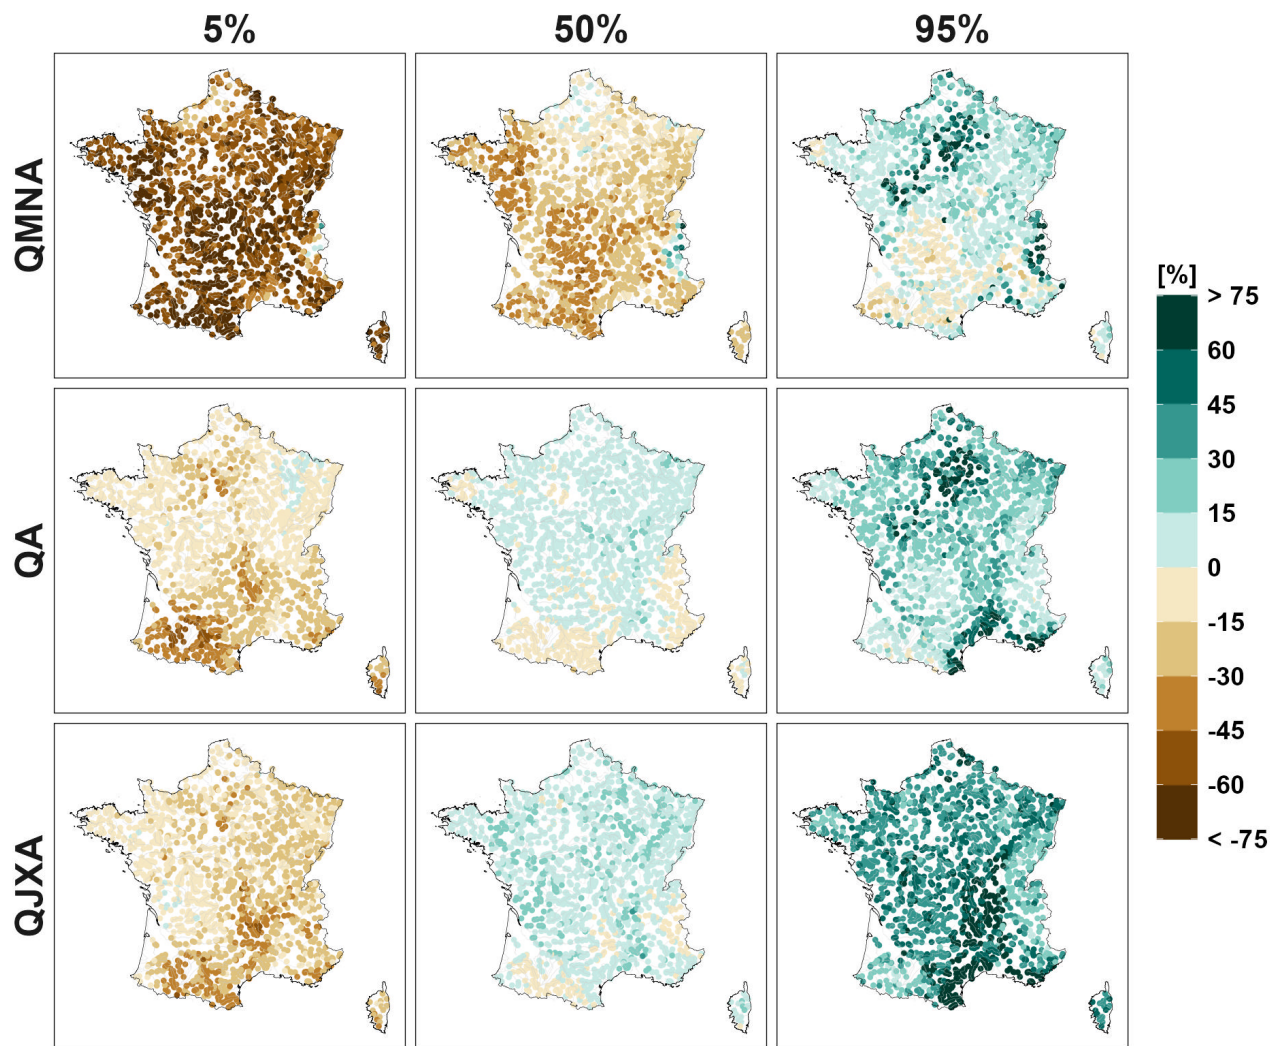

**Figure S4.** 5%, 50%, and 95% quantiles of the climate change responses for QMNA, QA, and QJXA changes (2071-2099 relative to 1976-2005) for the RCP4.5.

### S3 Main uncertainty sources for ETO and RX1D

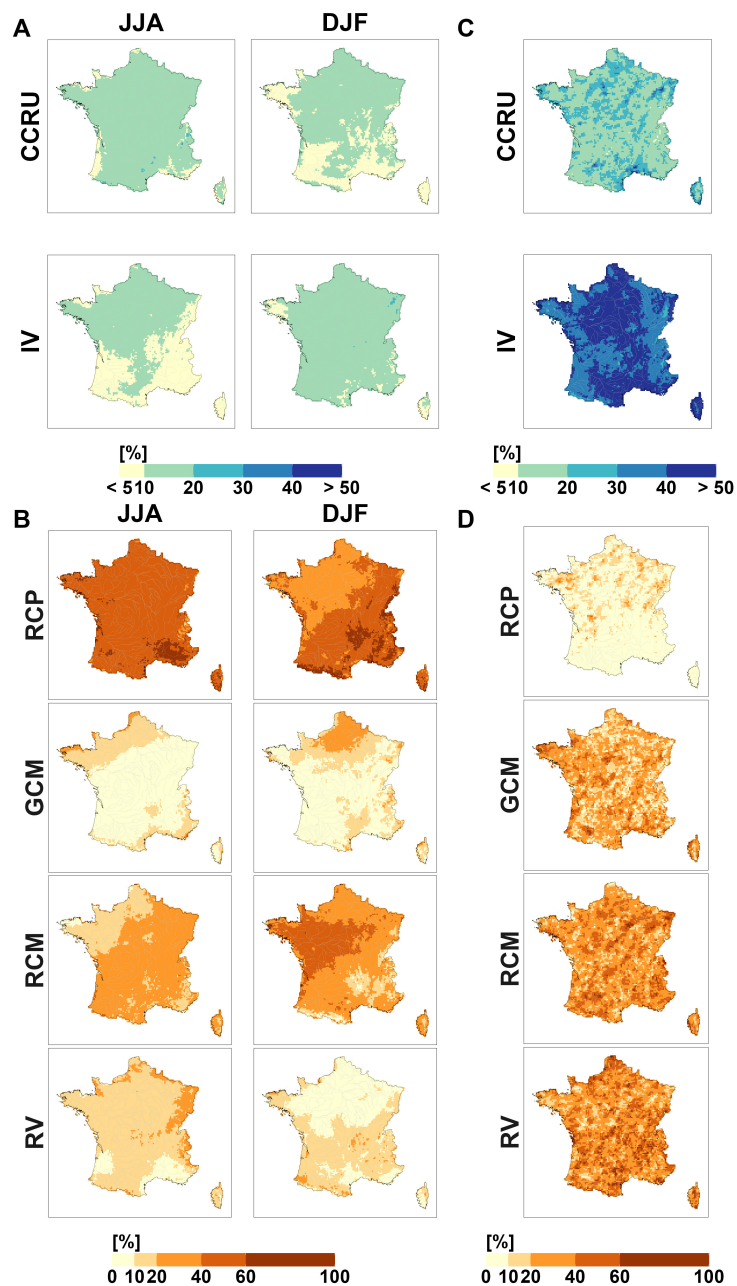

**Figure S5.** Uncertainty components for seasonal ETO (A-B) and RX1D (C-D) changes (2071-2099 relative to 1976-2005). (A and C) CCR uncertainty and internal variability (standard deviations expressed in % for relative changes). (B and D) Percentage contribution of uncertainty sources to the CCR variance.





**A**

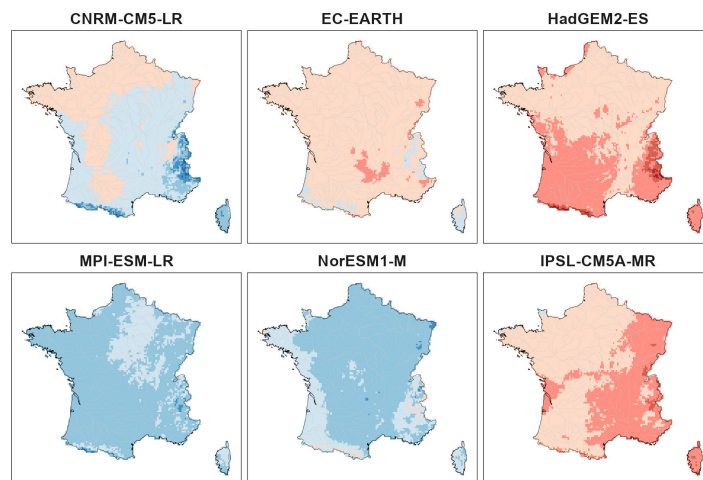

**B**

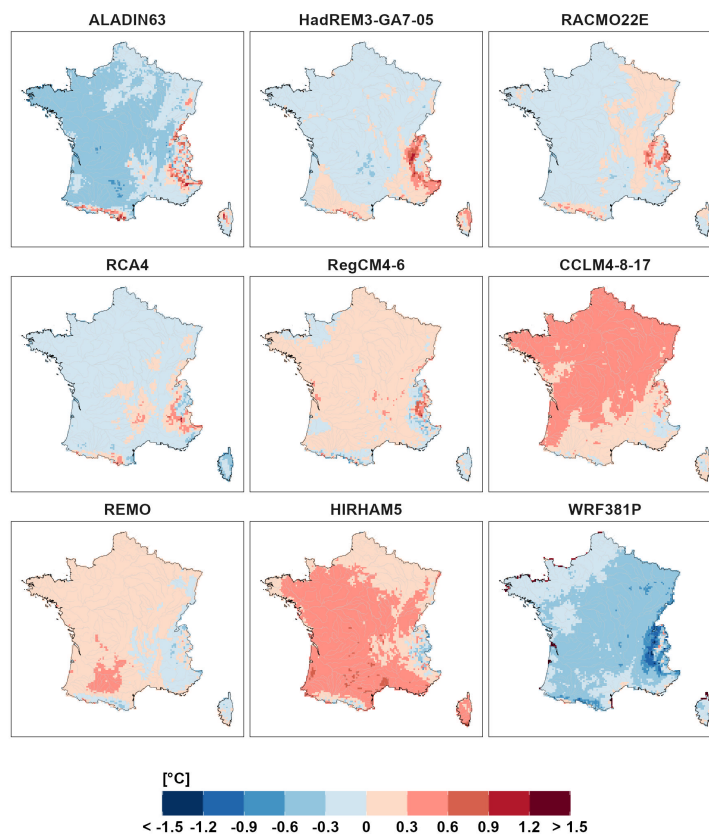

**Figure S6.** Main effects (i.e. deviations from the grand ensemble mean) of individual GCMs and RCMs for winter temperature changes (2071-2099 relative to 1976-2005).

**A**

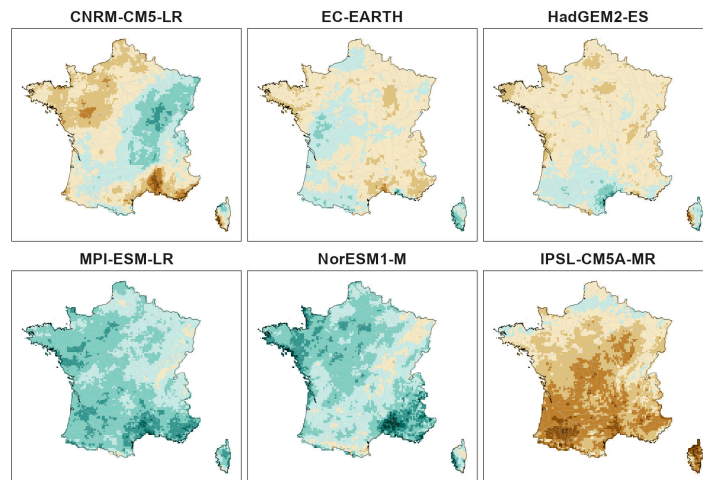

**B**

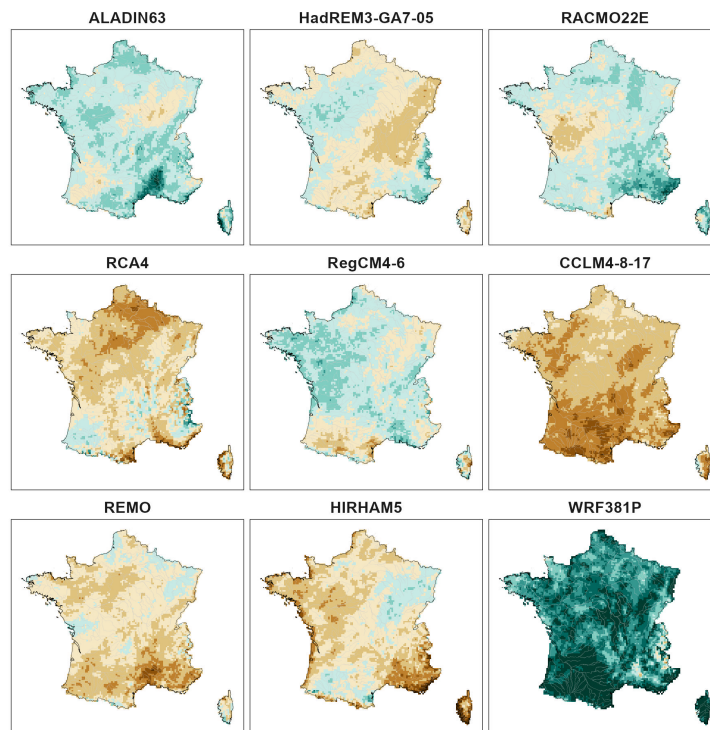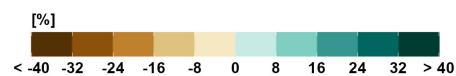

**Figure S7.** Main effects of individual GCMs and RCMs for summer precipitation changes (2071-2099 relative to 1976-2005).

**A**

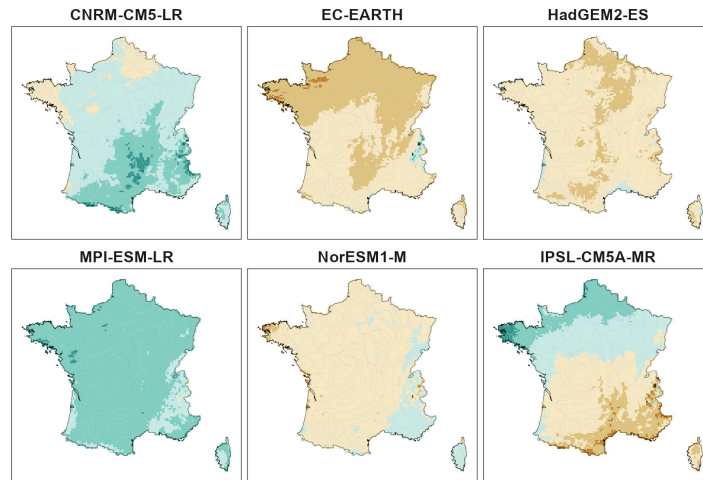

**B**

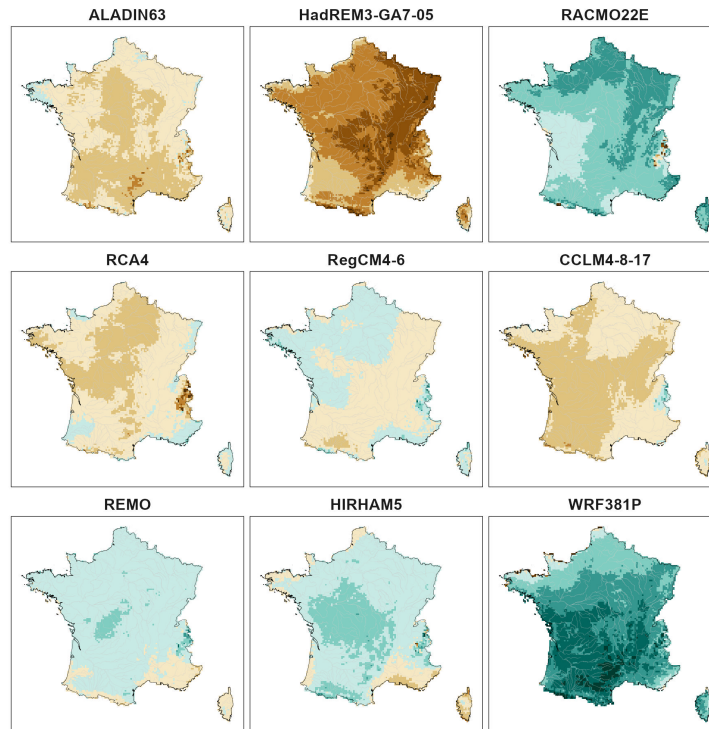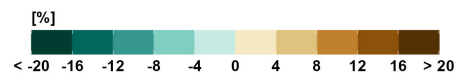

**Figure S8.** Main effects of individual GCMs and RCMs for summer reference evapotranspiration changes (2071-2099 relative to 1976-2005).

**A**

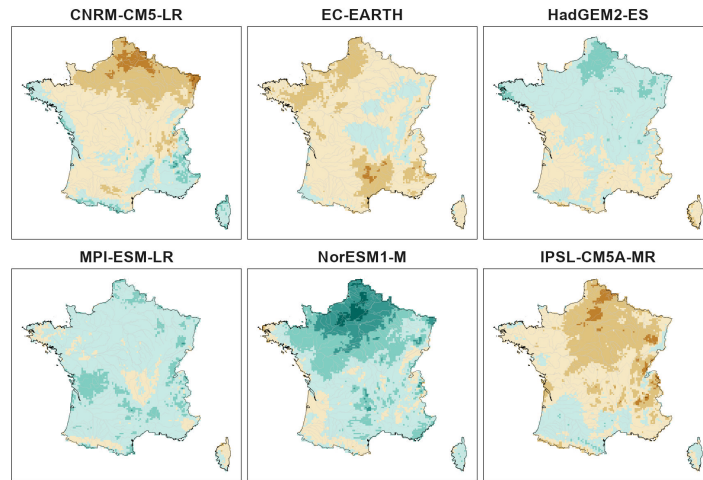

**B**

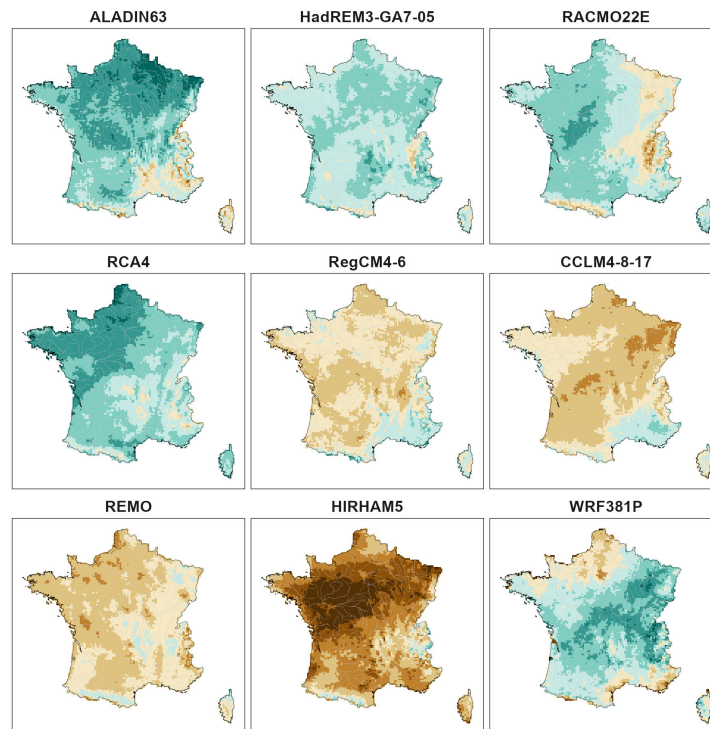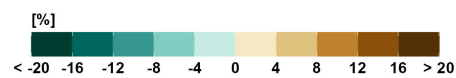

**Figure S9.** Main effects of individual GCMs and RCMs for winter reference evapotranspiration changes (2071-2099 relative to 1976-2005).

**A**

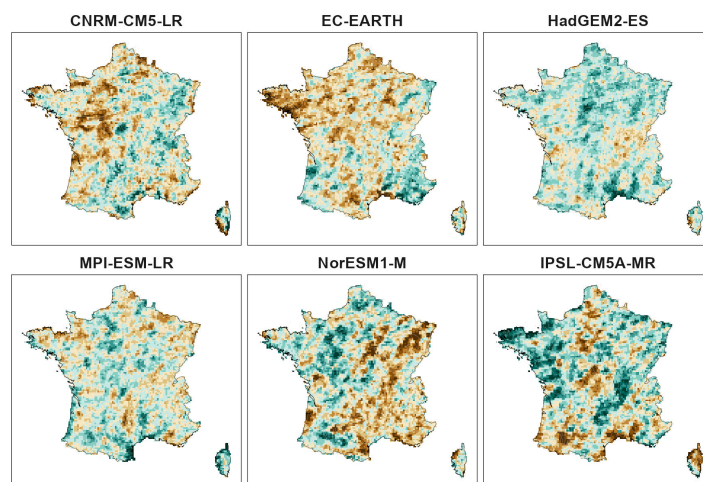

**B**

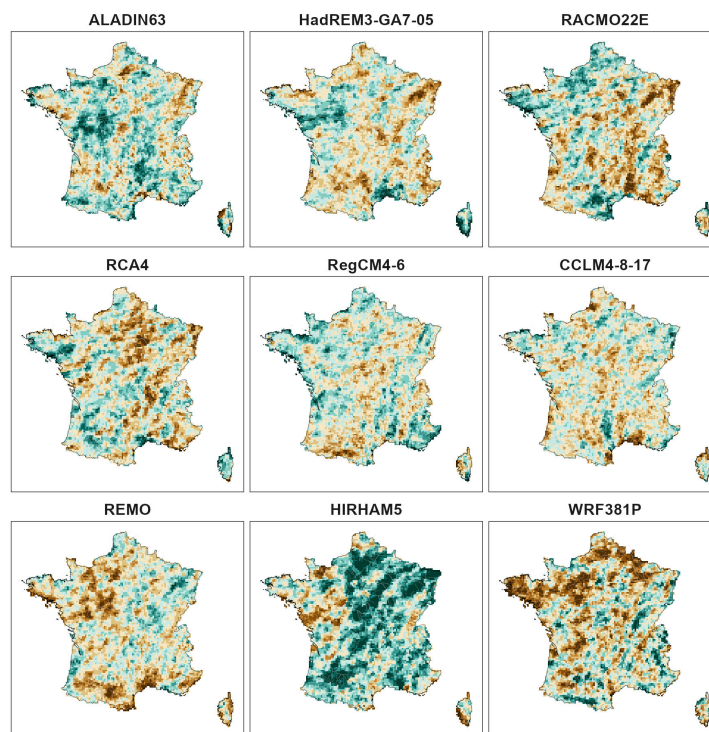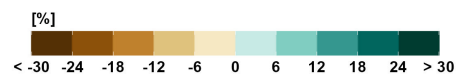

**Figure S10.** Main effects of individual GCMs and RCMs for annual daily maximum precipitation changes (2071-2099 relative to 1976-2005).





**A**

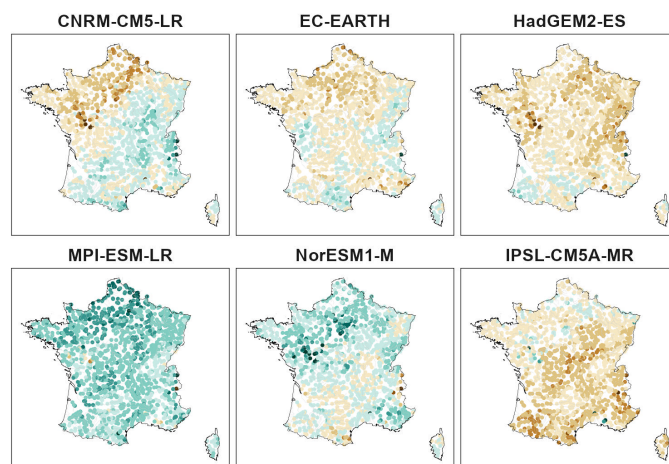

**B**

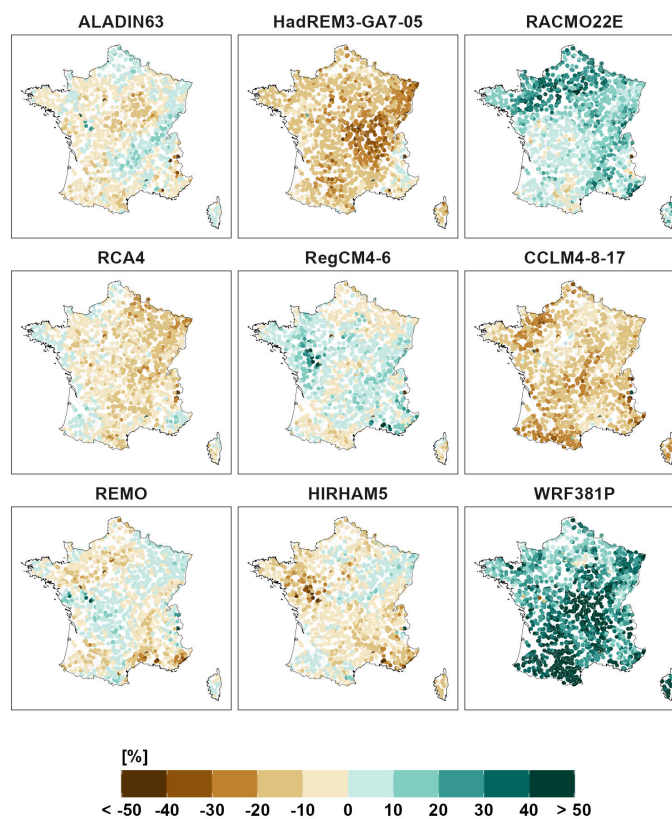

**Figure S11.** Main effects of individual GCMs and RCMs for QMNA changes (2071-2099 relative to 1976-2005).

**A**

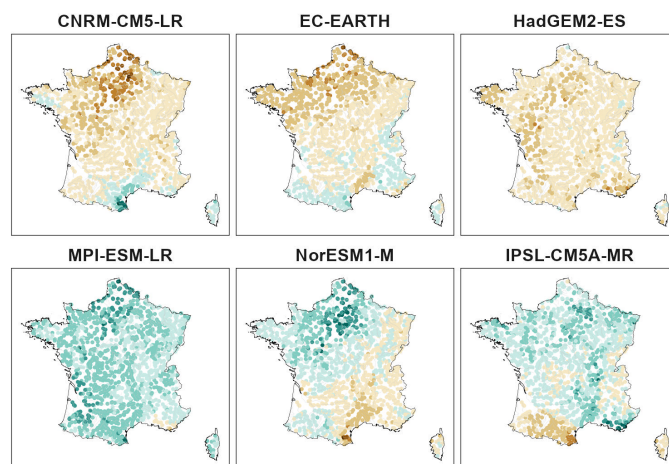

**B**

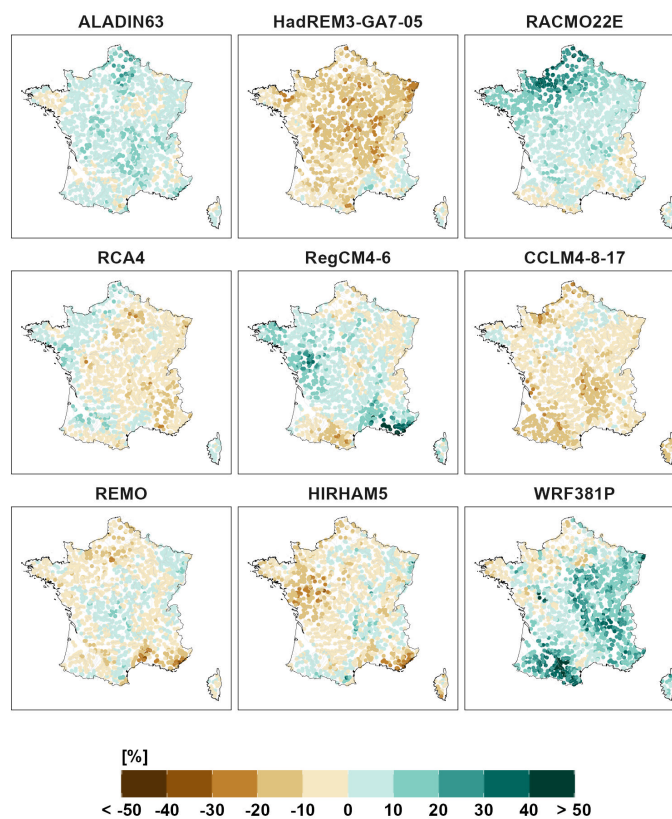

**Figure S12.** Main effects of individual GCMs and RCMs for QA changes (2071-2099 relative to 1976-2005).

**A**

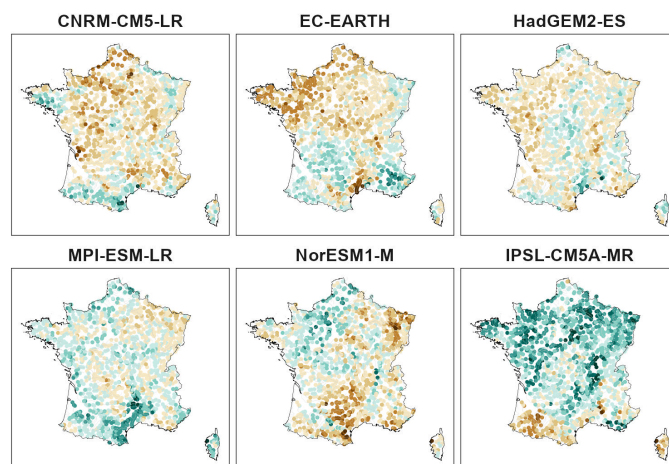

**B**

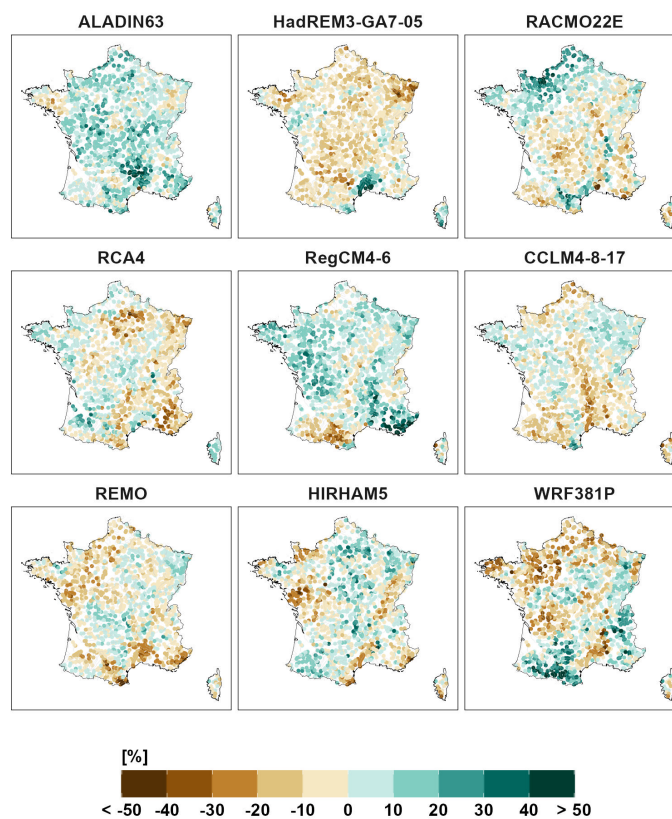

**Figure S13.** Main effects of individual GCMs and RCMs for QJXA changes (2071-2099 relative to 1976-2005).
